# Supplementary material
Source: publisher figshare collection journal article supplement (https://frontiersin.figshare.com/ndownloader/files/28106781)
Supplement: Supplementary file [file 28106781]

## *Supplementary Material*

**Supplementary Figure 1.** Validation plot obtained from 200 times of permutation tests.

**Supplementary Figure 2.** Verification of higher levels of the serum marker metabolites in responders than in non-responders by the enzymatic assays.

**Supplementary Table 1.** Association between the therapeutic effect and clinical covariables in the discovery and validation sets.

**Supplementary Table 2.** Identified differential metabolites between responders and non-responders in the discovery set.

**Supplementary Table 3.** Binary logistic regression result based on the forward stepwise (Wald) method.

**Supplementary Table 4.** Univariable and multivariable analysis of PFS in the discovery set.

**Supplementary Table 5.** Univariable and multivariable analysis of OS in the discovery set.

**Supplementary Table 6.** Univariable and multivariable analysis of PFS in the validation sets.

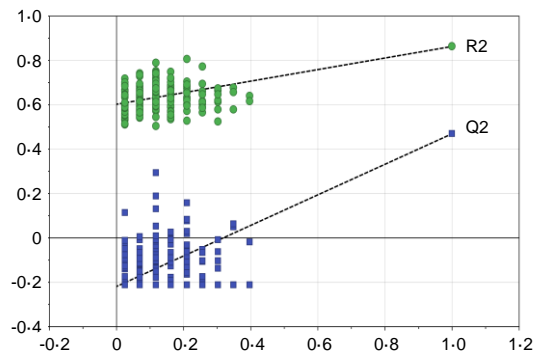

**Supplementary Figure 1.** Validation plot obtained from 200 times of permutation tests. The intercepts of  $R^2 = (0.0, 0.6)$  and  $Q^2 = (0.0, -0.21)$  illustrate that the OPLS-DA model is not over-fitting.

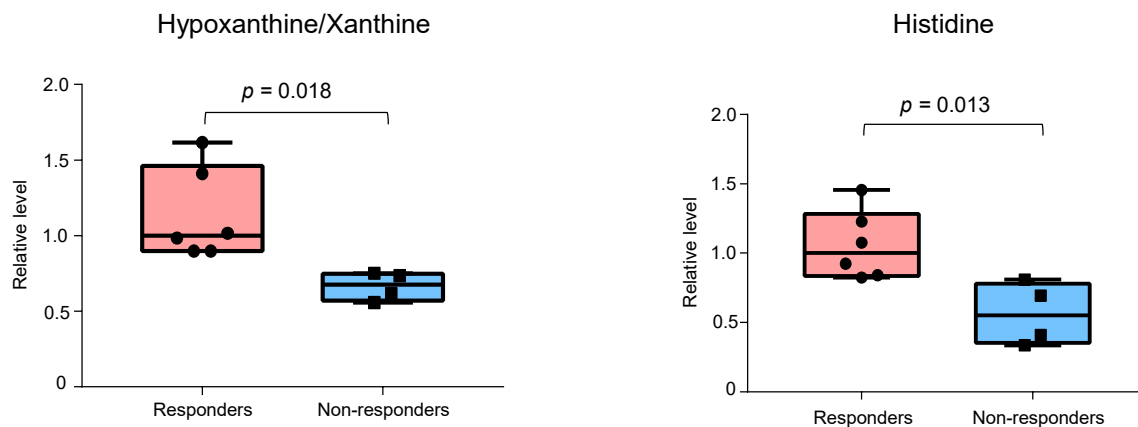

**Supplementary Figure 2.** Verification of higher levels of the serum marker metabolites in responders than in non-responders by the enzymatic assays. The serum samples from the validation set 2 were used for the enzymatic assays. Metabolite concentrations were normalized to the median value in the responder group. The box plots depict the minimum and maximum values (whiskers), the upper and lower quartiles, and the median. Groups were compared by Wilcoxon-Mann-Whitney test with Benjamini-Hochberg-based adjustment for multiple comparisons.

**Supplementary Table 1.** Association between the therapeutic effect and clinical covariables in the discovery and validation sets.

| Characteristics           | Discovery set |             |                      | Validation set 1 |            |                      | Validation set 2 |            |                      |
|---------------------------|---------------|-------------|----------------------|------------------|------------|----------------------|------------------|------------|----------------------|
|                           | (n = 43)      |             |                      | (n = 21)         |            |                      | (n = 10)         |            |                      |
|                           | R (n = 21)    | NR (n = 22) | p value <sup>a</sup> | R (n = 13)       | NR (n = 8) | p value <sup>a</sup> | R (n = 4)        | NR (n = 6) | p value <sup>a</sup> |
| Age                       |               |             |                      |                  |            |                      |                  |            |                      |
| ≥65                       | 5             | 8           | 0.370                | 5                | 1          | 0.336                | 1                | 4          | 0.524                |
| < 65                      | 16            | 14          |                      | 8                | 7          |                      | 3                | 2          |                      |
| Sex                       |               |             |                      |                  |            |                      |                  |            |                      |
| Male                      | 18            | 15          | 0.281                | 9                | 5          | >0.999               | 4                | 5          | >0.999               |
| Female                    | 3             | 7           |                      | 4                | 3          |                      | 0                | 1          |                      |
| Smoking status            |               |             |                      |                  |            |                      |                  |            |                      |
| Smoker                    | 17            | 14          | 0.206                | 9                | 2          | 0.080                | 3                | 5          | >0.999               |
| Non-smoker                | 4             | 8           |                      | 4                | 6          |                      | 1                | 1          |                      |
| Histology                 |               |             |                      |                  |            |                      |                  |            |                      |
| Squamous                  | 8             | 9           | 0.850                | 13               | 8          | >0.999               | 3                | 4          | >0.999               |
| Non-squamous              | 13            | 13          |                      | 0                | 0          |                      | 1                | 2          |                      |
| Disease stage             |               |             |                      |                  |            |                      |                  |            |                      |
| III                       | 4             | 2           | 0.412                | 0                | 1          | 0.381                | 0                | 1          | >0.999               |
| IV                        | 17            | 20          |                      | 13               | 7          |                      | 4                | 5          |                      |
| Metastasis                |               |             |                      |                  |            |                      |                  |            |                      |
| Yes                       | 17            | 20          | 0.412                | 13               | 1          | 0.381                | 4                | 5          | >0.999               |
| No                        | 4             | 2           |                      | 0                | 7          |                      | 0                | 1          |                      |
| Radiotherapy              |               |             |                      |                  |            |                      |                  |            |                      |
| Yes                       | 9             | 6           | 0.231                | 1                | 3          | 0.266                | 4                | 4          | 0.467                |
| No                        | 11            | 16          |                      | 6                | 3          |                      | 0                | 2          |                      |
| Unknown                   | 1             | 0           |                      | 6                | 2          |                      | 0                | 0          |                      |
| PD-L1 status <sup>b</sup> |               |             |                      |                  |            |                      |                  |            |                      |
| Negative                  | 12            | 16          | 0.116                | -                | -          | -                    | -                | -          | -                    |
| Positive                  | 9             | 4           |                      | -                | -          |                      | -                | -          |                      |
| Unknown                   | 0             | 2           |                      | -                | -          |                      | -                | -          |                      |

<sup>a</sup> P value represents Fisher's exact test or Chi-square function whenever required.<sup>b</sup> Immunohistochemistry cutoff for positivity on tumor cells of 1% or higher.

**Supplementary Table 2.** Identified differential metabolites between responders and non-responders in the discovery set.

| Metabolites             | ESI mode | VIP   | <i>p</i> value | FDR    | FC <sup>a</sup> | HMDB        | Compound category <sup>b</sup> |
|-------------------------|----------|-------|----------------|--------|-----------------|-------------|--------------------------------|
| Cystine                 | –        | 1.114 | 0.008          | 0.016  | -0.356          | HMDB0000192 | Amino acids                    |
| Threonine               | +        | 1.602 | <0.001         | <0.001 | -0.468          | HMDB0000167 | Amino acids                    |
| Histidine               | +        | 1.513 | <0.001         | <0.001 | -0.565          | HMDB0000177 | Amino acids                    |
| 3-Oxotetradecanoic acid | –        | 1.017 | 0.024          | 0.029  | 0.756           | HMDB0010730 | Fatty acids and conjugates     |
| 1,7-Dimethyluric acid   | –        | 1.168 | 0.016          | 0.017  | -1.370          | HMDB0011103 | Nucleotide and derivatives     |
| Hypoxanthine            | +        | 1.061 | <0.001         | <0.001 | -0.581          | HMDB0000157 | Nucleotide and derivatives     |

<sup>a</sup> the ratio of mean values of metabolite levels in non-responders to those of responders, and then log2 transformed.

<sup>b</sup> the chemical taxonomy in HMDB database.

FC, fold change.

**Supplementary Table 3.** Binary logistic regression result based on the forward stepwise (Wald) method.

|              | <b>B</b> | <b>S.E.</b> | <b>Wald</b> | <b><i>p</i> value</b> |
|--------------|----------|-------------|-------------|-----------------------|
| Hypoxanthine | 2.159    | 0.811       | 7.088       | 0.008                 |
| Histidine    | 2.159    | 0.811       | 7.088       | 0.008                 |
| Constant     | -2.176   | 0.726       | 8.989       | 0.003                 |

B, Binary logistic regression coefficient; S.E., Standard errors.

**Supplementary Table 4.** Univariable and multivariable analysis of PFS in the discovery set.

| Factors                             | Univariable analysis |                | Multivariable analysis |                |
|-------------------------------------|----------------------|----------------|------------------------|----------------|
|                                     | HR (95% CI)          | <i>p</i> value | HR (95% CI)            | <i>p</i> value |
| Age, $\geq 65$ vs. $< 65$           | 0.833 (0.387-1.790)  | 0.639          |                        |                |
| Sex, Female vs. male                | 0.655 (0.304-1.409)  | 0.279          |                        |                |
| Histology,                          |                      |                |                        |                |
| Non-squamous vs.Squamous            | 1.054 (0.527-2.108)  | 0.882          |                        |                |
| Smoke,                              |                      |                |                        |                |
| Smoker vs. Non-smoker               | 0.600 (0.291-1.238)  | 0.167          |                        |                |
| Disease stage, IV vs. III           | 4.049 (0.962-17.035) | 0.056          |                        |                |
| Metastasis, Yes vs. No              | 4.049 (0.962-17.035) | 0.056          |                        |                |
| Radiotherapy, Yes vs. No            | 1.041 (0.511-2.122)  | 0.912          |                        |                |
| PD-L1 status, Positive vs. Negative | 0.431 (0.191-0.974)  | 0.043          | 0.653 (0.264-1.619)    | 0.358          |
| Hypoxanthine, High vs. Low          | 0.215 (0.102-0.449)  | $< 0.001$      |                        |                |
| Histidine, High vs. Low             | 0.336 (0.166-0.679)  | 0.002          |                        |                |
| Combination,                        |                      |                |                        |                |
| High in 1 vs. Low in 2              | 0.173 (0.069-0.430)  | $< 0.001$      | 0.170 (0.067-0.431)    | $< 0.001$      |
| High in 2 vs. Low in 2              | 0.078 (0.027-0.221)  | $< 0.001$      | 0.094 (0.031-0.289)    | $< 0.001$      |

**Supplementary Table 5.** Univariable and multivariable analysis of OS in the discovery set.

| Factors                             | Univariable analysis |                | Multivariable analysis |                |
|-------------------------------------|----------------------|----------------|------------------------|----------------|
|                                     | HR (95% CI)          | <i>p</i> value | HR (95% CI)            | <i>p</i> value |
| Age, $\geq 65$ vs. $< 65$           | 1.194 (0.467-3.057)  | 0.711          |                        |                |
| Sex, Female vs. male                | 1.036 (0.379-2.827)  | 0.945          |                        |                |
| Histology,                          |                      |                |                        |                |
| Non-squamous vs.Squamous            | 0.947 (0.396-2.267)  | 0.903          |                        |                |
| Smoke,                              |                      |                |                        |                |
| Smoker vs. Non-smoker               | 0.916 (0.357-2.354)  | 0.856          |                        |                |
| Disease stage, IV vs. III           | 1.745 (0.406-7.498)  | 0.454          |                        |                |
| Metastasis, Yes vs. No              | 1.745 (0.406-7.498)  | 0.454          |                        |                |
| Radiotherapy, Yes vs. No            | 1.286 (0.529-3.127)  | 0.579          |                        |                |
| PD-L1 status, Positive vs. Negative | 0.285 (0.082-0.986)  | 0.047          | 0.494 (0.123-1.985)    | 0.320          |
| Hypoxanthine, High vs. Low          | 0.247 (0.099-0.449)  | 0.003          |                        |                |
| Histidine, High vs. Low             | 0.298 (0.121-0.737)  | 0.009          |                        |                |
| Combination,                        |                      |                |                        |                |
| High in 1 vs. Low in 2              | 0.209 (0.076-0.578)  | 0.003          | 0.249 (0.087-0.707)    | 0.009          |
| High in 2 vs. Low in 2              | 0.124 (0.039-0.397)  | $< 0.001$      | 0.194 (0.051-0.730)    | 0.015          |



**Supplementary Table 6.** Univariable and multivariable analysis of PFS in the validation sets.

| Factors                     | Validation set 1     |                |                        |                | Validation set 2     |                |                        |                |
|-----------------------------|----------------------|----------------|------------------------|----------------|----------------------|----------------|------------------------|----------------|
|                             | Univariable analysis |                | Multivariable analysis |                | Univariable analysis |                | Multivariable analysis |                |
|                             | HR (95% CI)          | <i>p</i> value | HR (95% CI)            | <i>p</i> value | HR (95%CI)           | <i>p</i> value | HR (95% CI)            | <i>p</i> value |
| Age, $\geq 65$ vs. $< 65$   | 1.437 (0.467-4.419)  | 0.527          |                        |                | 0.919 (0.239-3.536)  | 0.902          |                        |                |
| Sex, Female vs. male        | 0.583 (0.195-1.744)  | 0.335          |                        |                | 0.111 (0.007-1.776)  | 0.120          |                        |                |
| Histology,                  |                      |                |                        |                |                      |                |                        |                |
| Non-squamous vs.Squamous    | -                    | -              |                        |                | 1.43 (0.289-7.082)   | 0.661          |                        |                |
| Smoke,                      |                      |                |                        |                |                      |                |                        |                |
| Smoker vs. Non-smoker       | 0.261 (0.079-0.862)  | 0.028          | 0.532 (0.139-2.039)    | 0.357          | 2.599 (0.310-21.799) | 0.379          |                        |                |
| Disease stage, IV vs. III   | -                    | -              |                        |                | 0.579 (0.064-5.230)  | 0.627          |                        |                |
| Metastasis, Yes vs. No      | -                    | -              |                        |                | 0.579 (0.064-5.230)  | 0.627          |                        |                |
| Radiotherapy, Yes vs. No    | -                    | -              |                        |                | 0.297 (0.049-1.797)  | 0.186          |                        |                |
| Hypoxanthine and Histidine, |                      |                |                        |                |                      |                |                        |                |
| High vs. Low                | 0.137 (0.040-0.467)  | 0.001          | 0.184 (0.047-0.715)    | 0.014          | 0.084 (0.009-0.762)  | 0.028          |                        |                |
